# Supplementary material for: Comprehensive Quality Analysis of an Organic Alternative Curing Process in Boneless Ham Using Consumer Sensory Evaluation and Artificial Intelligence
Source: Research Square preprint supplement (doi:10.21203/rs.3.rs-8905083/v1), 2026-02-19
Supplement: Supplementary file 1 [file 94b6b8309b41dd02f9167a03.docx]

The codes for the machine learning model and the Monte Carlo model are available via GitHub at https://github.com/hannah816/Ham
